# Supplementary material for: Role of two sequence motifs of mesencephalic astrocyte-derived neurotrophic factor in its survival-promoting activity
Source: PubMed Central journal article supplement (PMC4720903; doi:10.1038/cddis.2015.371), 2015-12-31
Supplement: cddis2015371x2.pdf [file cddis2015371x2.pdf]

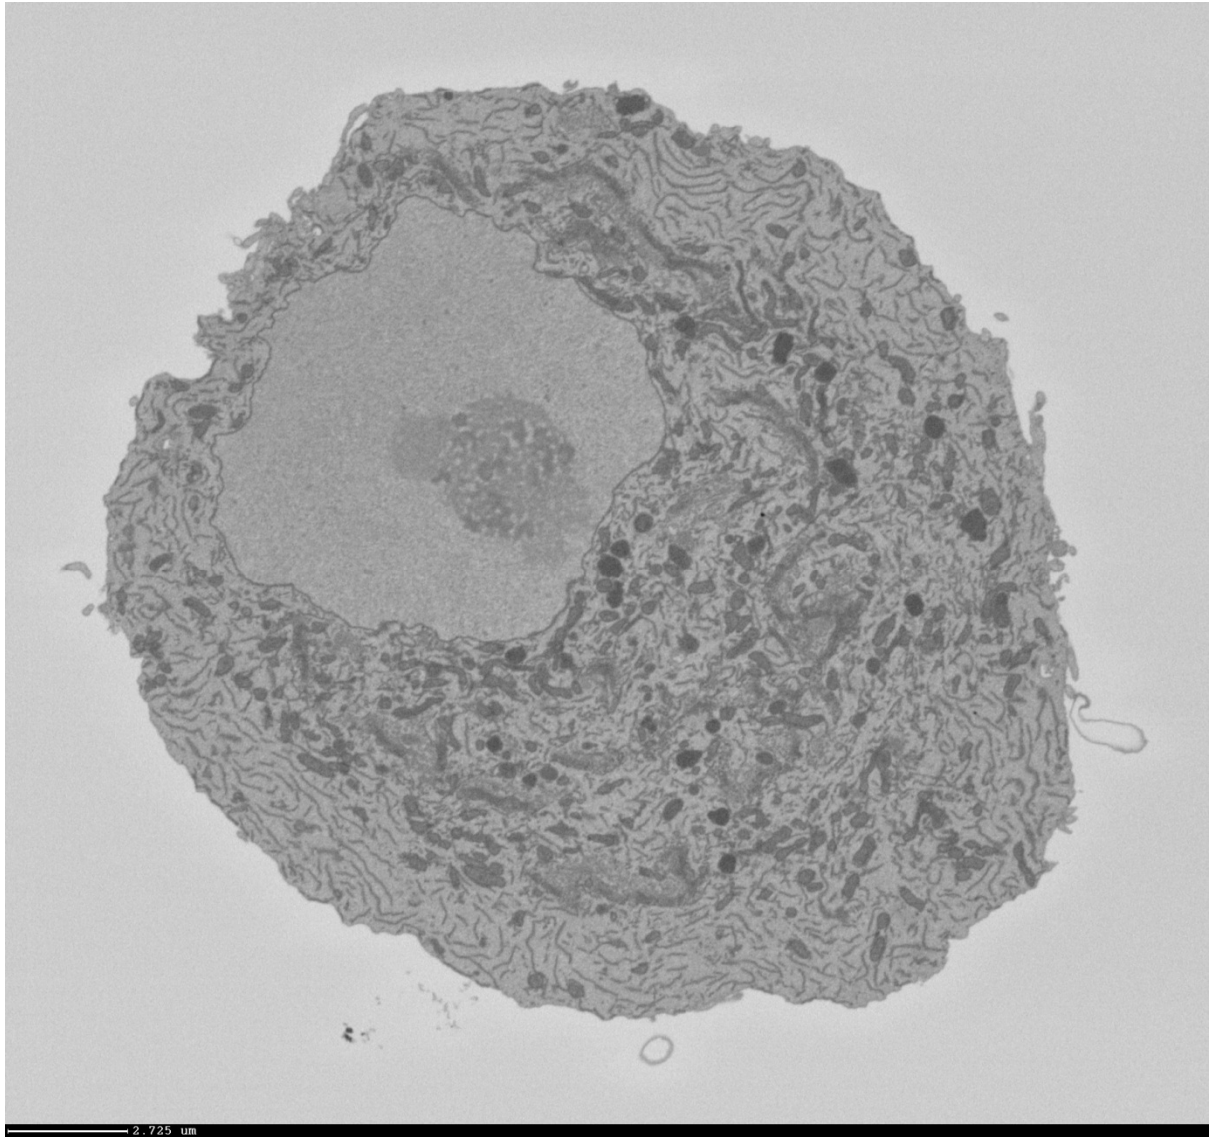

**Supplementary Figure 2.** Block face image of the sympathetic neuron from newborn mouse superior cervical ganglion (SCG), grown on glass coverslip for six days with nerve growth factor (NGF), was acquired with a FEG-SEM Quanta 250 (FEI) using a backscattered electron detector (Gatan). Specimen preparation and imaging conditions as described in Puhka et al., *Mol. Biol. Cell* 23:2424-2432, 2012. Note the densely packed endoplasmic reticulum on the periphery of the cell. The scale bar is shown on the left bottom corner.
